# Supplementary material for: Cisplatin Increases Sensitivity to FGFR Inhibition in Patient-Derived Xenograft Models of Lung Squamous Cell Carcinoma
Source: Oxford University Press journal article supplement (doi:10.1158/1535-7163.mct-17-0174), 2017-06-13
Supplement: 15357163mct170174-sup-179452_2_unknown_upload_3985932_ppkrx0.xlsx [file 15357163mct170174-sup-179452_2_unknown_upload_3985932_ppkrx0.xlsx]

## Sheet: Sheet1
Supplementary Table S2: GO term enrichment analysis of differentially expressed genes between t1 and t0, overlapping in PDX 788, 926, 792
	Term	Ont	N	DE	P.DE	adj.P.val
GO:0006958	complement activation, classical pathway	BP	49	23	4.53061e-42	5.07723e-38
GO:0006956	complement activation	BP	70	25	4.94471e-42	5.07723e-38
GO:0002455	humoral immune response mediated by circulating immunoglobulin	BP	57	23	4.02123e-40	2.75266e-36
GO:0072376	protein activation cascade	BP	83	25	7.96937e-40	4.09147e-36
GO:0006959	humoral immune response	BP	149	27	2.08808e-36	8.57618e-33
GO:0042571	immunoglobulin complex, circulating	CC	17	15	4.45468e-34	1.52469e-30
GO:0016064	immunoglobulin mediated immune response	BP	108	23	1.17361e-32	3.44302e-29
GO:0019724	B cell mediated immunity	BP	110	23	1.86892e-32	4.79753e-29
GO:0003823	antigen binding	MF	94	22	3.17882e-32	7.25337e-29
GO:0002250	adaptive immune response	BP	308	30	3.91764e-32	8.04526e-29
GO:0019814	immunoglobulin complex	CC	20	15	5.02438e-32	9.38005e-29
GO:0034987	immunoglobulin receptor binding	MF	21	15	1.75228e-31	2.99874e-28
GO:0072562	blood microparticle	CC	109	22	1.16878e-30	1.84632e-27
GO:0002449	lymphocyte mediated immunity	BP	203	24	1.48362e-27	2.17626e-24
GO:0002460	adaptive immune response based on somatic recombination of immune receptors built from immunoglobulin superfamily domains	BP	209	24	3.05635e-27	4.18434e-24
GO:0006955	immune response	BP	1260	42	4.17739e-27	5.36169e-24
GO:0002684	positive regulation of immune system process	BP	817	36	9.09066e-27	1.09815e-23
GO:0002253	activation of immune response	BP	470	30	1.34222e-26	1.53132e-23
GO:0050776	regulation of immune response	BP	748	34	1.50508e-25	1.62675e-22
GO:0006909	phagocytosis	BP	215	23	2.32719e-25	2.38956e-22
GO:0050778	positive regulation of immune response	BP	578	31	3.01819e-25	2.9515e-22
GO:0002682	regulation of immune system process	BP	1142	39	3.40723e-25	3.18049e-22
GO:0006911	phagocytosis, engulfment	BP	43	15	4.52435e-25	4.03965e-22
GO:0002768	immune response-regulating cell surface receptor signaling pathway	BP	338	26	5.65254e-25	4.83669e-22
GO:0002443	leukocyte mediated immunity	BP	260	24	6.50004e-25	5.33939e-22
GO:0002429	immune response-activating cell surface receptor signaling pathway	BP	307	25	1.32677e-24	1.04795e-21
GO:0006910	phagocytosis, recognition	BP	26	13	2.16245e-24	1.64475e-21
GO:0002376	immune system process	BP	2011	47	2.53508e-24	1.8593e-21
GO:0004252	serine-type endopeptidase activity	MF	152	20	6.7162e-24	4.756e-21
GO:0099024	plasma membrane invagination	BP	51	15	9.25278e-24	6.33384e-21
GO:0002433	immune response-regulating cell surface receptor signaling pathway involved in phagocytosis	BP	89	17	2.75009e-23	1.76487e-20
GO:0038096	Fc-gamma receptor signaling pathway involved in phagocytosis	BP	89	17	2.75009e-23	1.76487e-20
GO:0038094	Fc-gamma receptor signaling pathway	BP	93	17	6.17217e-23	3.84096e-20
GO:0006897	endocytosis	BP	573	29	8.48407e-23	5.11796e-20
GO:0008236	serine-type peptidase activity	MF	172	20	8.72266e-23	5.11796e-20
GO:0002431	Fc receptor mediated stimulatory signaling pathway	BP	95	17	9.11351e-23	5.19875e-20
GO:0010324	membrane invagination	BP	59	15	1.12511e-22	6.24465e-20
GO:0017171	serine hydrolase activity	MF	175	20	1.24567e-22	6.73184e-20
GO:0002252	immune effector process	BP	592	29	2.11835e-22	1.11545e-19
GO:0002764	immune response-regulating signaling pathway	BP	457	26	1.30594e-21	6.70471e-19
GO:0002757	immune response-activating signal transduction	BP	425	25	4.16914e-21	2.08823e-18
GO:0050871	positive regulation of B cell activation	BP	75	15	6.07305e-21	2.96943e-18
GO:0006952	defense response	BP	1176	35	2.78369e-20	1.32944e-17
GO:0005615	extracellular space	CC	1016	33	3.8106e-20	1.77851e-17
GO:0008037	cell recognition	BP	117	16	1.76403e-19	8.05025e-17
GO:0050853	B cell receptor signaling pathway	BP	56	13	3.52147e-19	1.57211e-16
GO:0045087	innate immune response	BP	666	27	1.17655e-18	5.14078e-16
GO:0038093	Fc receptor signaling pathway	BP	201	18	1.86097e-18	7.96183e-16
GO:0050864	regulation of B cell activation	BP	109	15	2.39528e-18	1.00387e-15
GO:0006898	receptor-mediated endocytosis	BP	260	19	8.70942e-18	3.57713e-15
GO:0048584	positive regulation of response to stimulus	BP	1726	38	9.70176e-18	3.90658e-15
GO:0050867	positive regulation of cell activation	BP	278	19	3.05596e-17	1.20687e-14
GO:0051251	positive regulation of lymphocyte activation	BP	247	18	7.5321e-17	2.91848e-14
GO:0004175	endopeptidase activity	MF	347	20	1.09414e-16	4.16099e-14
GO:0051249	regulation of lymphocyte activation	BP	350	20	1.29296e-16	4.82766e-14
GO:0042742	defense response to bacterium	BP	149	15	2.98764e-16	1.09561e-13
GO:0002696	positive regulation of leukocyte activation	BP	269	18	3.4196e-16	1.23202e-13
GO:0050865	regulation of cell activation	BP	427	21	4.05348e-16	1.43521e-13
GO:0005576	extracellular region	CC	3663	50	7.64557e-16	2.66118e-13
GO:0002694	regulation of leukocyte activation	BP	397	20	1.46641e-15	5.01902e-13
GO:0008233	peptidase activity	MF	519	22	1.55777e-15	5.24431e-13
GO:0016192	vesicle-mediated transport	BP	1304	31	5.60567e-15	1.85674e-12
GO:0045321	leukocyte activation	BP	631	23	7.8746e-15	2.56687e-12
GO:0070011	peptidase activity, acting on L-amino acid peptides	MF	504	21	1.10216e-14	3.53657e-12
GO:0007166	cell surface receptor signaling pathway	BP	2259	39	1.15892e-14	3.66148e-12
GO:0048583	regulation of response to stimulus	BP	3123	45	1.5956e-14	4.96473e-12
GO:0042113	B cell activation	BP	198	15	2.14543e-14	6.57591e-12
GO:0009986	cell surface	CC	604	22	3.53317e-14	1.06702e-11
GO:0046649	lymphocyte activation	BP	543	21	4.77315e-14	1.4206e-11
GO:0001775	cell activation	BP	769	24	5.43099e-14	1.5933e-11
GO:0044421	extracellular region part	CC	3230	45	5.80089e-14	1.67785e-11
GO:0038095	Fc-epsilon receptor signaling pathway	BP	138	13	8.14249e-14	2.32242e-11
GO:0009897	external side of plasma membrane	CC	195	14	3.63111e-13	1.02148e-10
GO:0050851	antigen receptor-mediated signaling pathway	BP	209	14	9.41242e-13	2.61207e-10
GO:0009617	response to bacterium	BP	398	16	4.50562e-11	1.2337e-08
GO:0098542	defense response to other organism	BP	343	15	6.09935e-11	1.64811e-08
GO:0098552	side of membrane	CC	365	15	1.4586e-10	3.89009e-08
GO:0005102	receptor binding	MF	1161	24	3.38103e-10	8.90165e-08
GO:0048518	positive regulation of biological process	BP	4462	47	4.05354e-10	1.05372e-07
GO:0071745	IgA immunoglobulin complex	CC	4	4	4.8121e-10	1.17644e-07
GO:0071746	IgA immunoglobulin complex, circulating	CC	4	4	4.8121e-10	1.17644e-07
GO:0071748	monomeric IgA immunoglobulin complex	CC	4	4	4.8121e-10	1.17644e-07
GO:0071749	polymeric IgA immunoglobulin complex	CC	4	4	4.8121e-10	1.17644e-07
GO:0071751	secretory IgA immunoglobulin complex	CC	4	4	4.8121e-10	1.17644e-07
GO:0006950	response to stress	BP	3097	38	1.4675e-09	3.54547e-07
GO:0005886	plasma membrane	CC	3754	42	1.64513e-09	3.92841e-07
GO:0050896	response to stimulus	BP	6504	56	2.19536e-09	5.18205e-07
GO:0009605	response to external stimulus	BP	1622	27	2.28314e-09	5.32802e-07
GO:0044765	single-organism transport	BP	2283	32	2.76998e-09	6.3915e-07
GO:0071944	cell periphery	CC	3849	42	3.70389e-09	8.45146e-07
GO:0007165	signal transduction	BP	4469	45	7.8044e-09	1.76122e-06
GO:0009607	response to biotic stimulus	BP	672	17	1.23705e-08	2.7613e-06
GO:0006508	proteolysis	BP	1406	24	1.5507e-08	3.42421e-06
GO:1902578	single-organism localization	BP	2489	32	2.40249e-08	5.24866e-06
GO:0044700	single organism signaling	BP	4827	46	2.8086e-08	6.0713e-06
GO:0023052	signaling	BP	4834	46	2.95219e-08	6.31522e-06
GO:0007154	cell communication	BP	4852	46	3.35437e-08	7.10158e-06
GO:0043207	response to external biotic stimulus	BP	641	16	4.32632e-08	8.97428e-06
GO:0051707	response to other organism	BP	641	16	4.32632e-08	8.97428e-06
GO:0031982	vesicle	CC	3260	36	1.0243e-07	2.05267e-05
GO:0071750	dimeric IgA immunoglobulin complex	CC	3	3	1.04953e-07	2.05267e-05
GO:0071752	secretory dimeric IgA immunoglobulin complex	CC	3	3	1.04953e-07	2.05267e-05
GO:0071753	IgM immunoglobulin complex	CC	3	3	1.04953e-07	2.05267e-05
GO:0071754	IgM immunoglobulin complex, circulating	CC	3	3	1.04953e-07	2.05267e-05
GO:0071756	pentameric IgM immunoglobulin complex	CC	3	3	1.04953e-07	2.05267e-05
GO:0051179	localization	BP	4913	45	1.86004e-07	3.60356e-05
GO:0044459	plasma membrane part	CC	2008	27	2.17631e-07	4.17689e-05
GO:0070062	extracellular exosome	CC	2481	30	3.46491e-07	6.58847e-05
GO:1903561	extracellular vesicle	CC	2489	30	3.7225e-07	7.01199e-05
GO:0043230	extracellular organelle	CC	2490	30	3.75593e-07	7.01199e-05
GO:0019731	antibacterial humoral response	BP	33	5	4.65107e-07	8.6049e-05
GO:0031988	membrane-bounded vesicle	CC	3145	34	5.29145e-07	9.70224e-05
GO:0019730	antimicrobial humoral response	BP	36	5	7.3061e-07	0.000132777
GO:0006810	transport	BP	3870	38	8.27636e-07	0.000149091
GO:0003094	glomerular filtration	BP	19	4	1.76661e-06	0.000315471
GO:0051234	establishment of localization	BP	3987	38	1.83431e-06	0.000324736
GO:0060267	positive regulation of respiratory burst	BP	6	3	2.07747e-06	0.000364641
GO:0097205	renal filtration	BP	20	4	2.20029e-06	0.000382926
GO:0051716	cellular response to stimulus	BP	5487	45	6.09066e-06	0.00105107
GO:0060326	cell chemotaxis	BP	209	8	6.75061e-06	0.00115525
GO:0044425	membrane part	CC	4983	42	9.32463e-06	0.00158257
GO:0019538	protein metabolic process	BP	4668	40	1.31175e-05	0.00220804
GO:0070663	regulation of leukocyte proliferation	BP	170	7	1.64608e-05	0.00274828
GO:0060263	regulation of respiratory burst	BP	11	3	1.68467e-05	0.00279004
GO:0005602	complement component C1 complex	CC	2	2	2.25648e-05	0.00370712
GO:0030246	carbohydrate binding	MF	191	7	3.48401e-05	0.00567838
GO:0061024	membrane organization	BP	968	15	4.32489e-05	0.00699339
GO:0006968	cellular defense response	BP	42	4	4.69483e-05	0.00753227
GO:0004982	N-formyl peptide receptor activity	MF	3	2	6.74845e-05	0.0107431
GO:0002548	monocyte chemotaxis	BP	48	4	7.9868e-05	0.0126167
GO:0070661	leukocyte proliferation	BP	218	7	8.04877e-05	0.0126175
GO:0098602	single organism cell adhesion	BP	684	12	8.82502e-05	0.0137296
GO:0016787	hydrolase activity	MF	2133	23	9.42561e-05	0.0145537
GO:0050670	regulation of lymphocyte proliferation	BP	163	6	0.00012735	0.0195169
GO:0050900	leukocyte migration	BP	316	8	0.000128645	0.0195693
GO:0032944	regulation of mononuclear cell proliferation	BP	164	6	0.000131692	0.0198854
GO:0001895	retina homeostasis	BP	55	4	0.000136502	0.0204614
GO:0001894	tissue homeostasis	BP	171	6	0.000165475	0.0246245
GO:0045730	respiratory burst	BP	23	3	0.000173517	0.0256356
GO:0004930	G-protein coupled receptor activity	MF	248	7	0.000179304	0.0263013
GO:0016337	single organismal cell-cell adhesion	BP	633	11	0.000194909	0.0283877
GO:0071674	mononuclear cell migration	BP	61	4	0.000204399	0.0295602
GO:0007155	cell adhesion	BP	1517	18	0.000213941	0.0307171
GO:0007186	G-protein coupled receptor signaling pathway	BP	534	10	0.00021539	0.0307171
GO:0022610	biological adhesion	BP	1522	18	0.000222929	0.031573
GO:0042129	regulation of T cell proliferation	BP	123	5	0.000303425	0.042679
GO:0072676	lymphocyte migration	BP	68	4	0.00031104	0.0434524
GO:0014911	positive regulation of smooth muscle cell migration	BP	28	3	0.000315513	0.0437795
GO:0004872	receptor activity	MF	910	13	0.000336364	0.0460504
GO:0060089	molecular transducer activity	MF	910	13	0.000336364	0.0460504
GO:0050789	regulation of biological process	BP	8752	56	0.000368109	0.0500629
GO:0046651	lymphocyte proliferation	BP	204	6	0.000427665	0.0577798
GO:0016020	membrane	CC	7215	49	0.000433702	0.0582124
